# Supplementary material
Source: publisher figshare collection journal article supplement (https://acs.figshare.com/ndownloader/files/4625080)
Supplement: Supplementary file 1 [file 4625080]

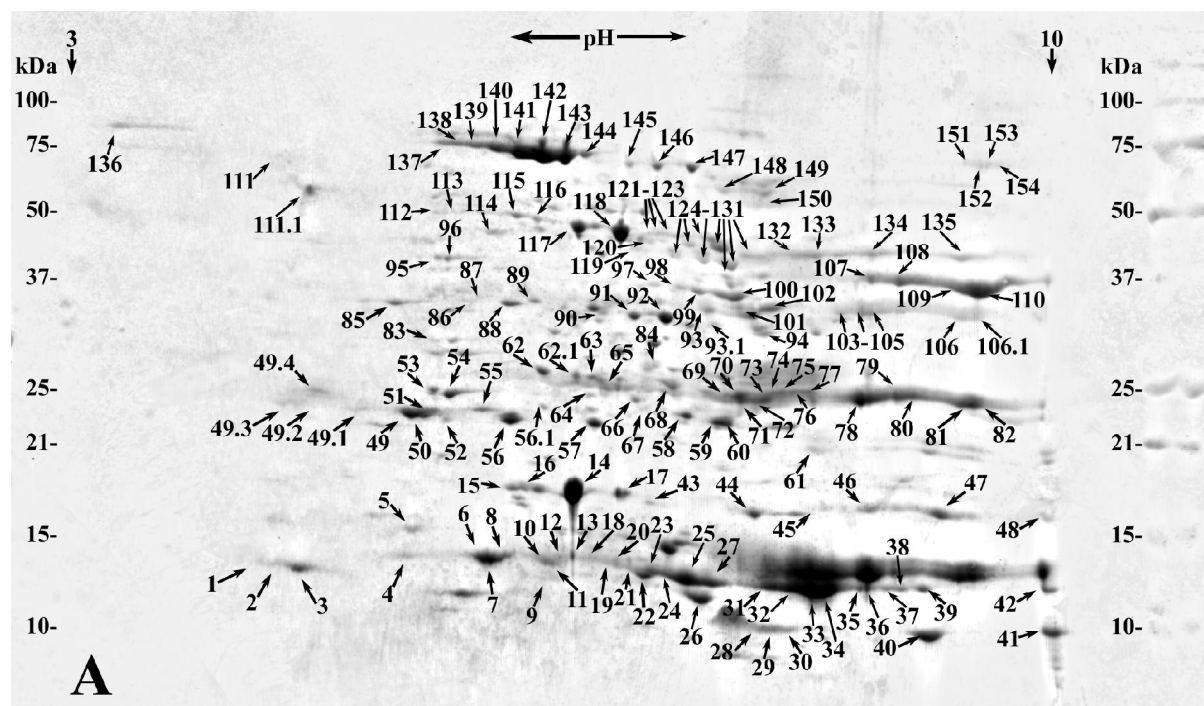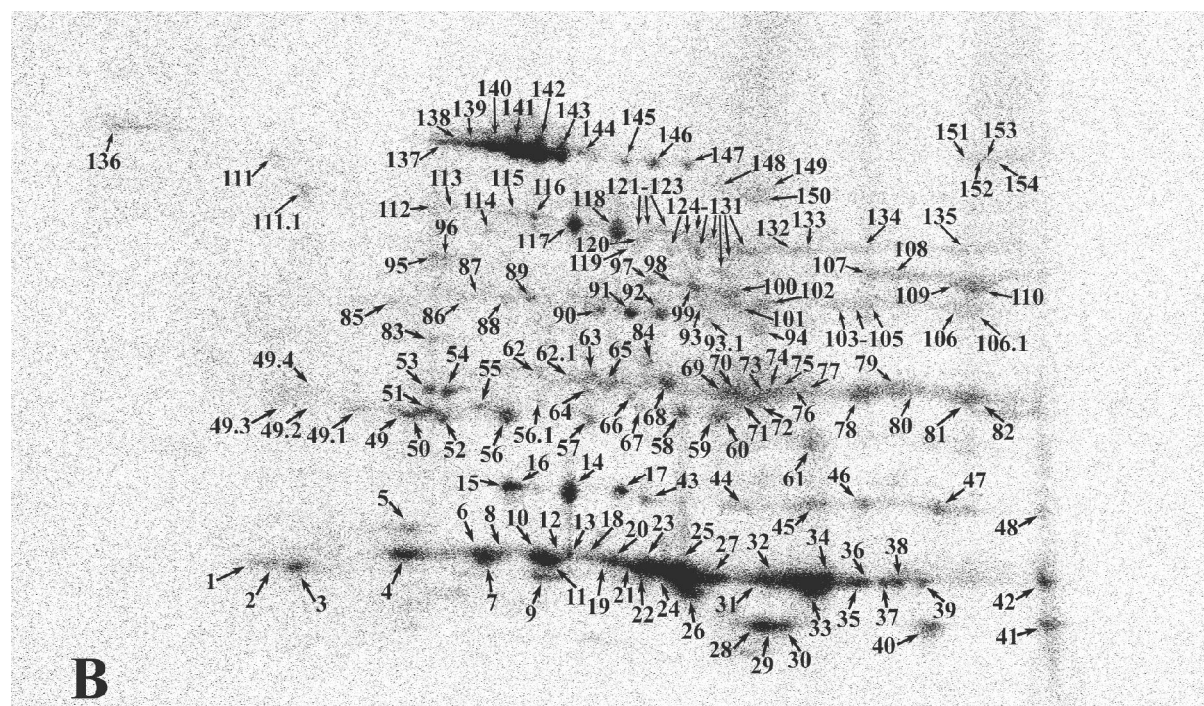

**Figure S1.** Separation of rat liver cytosolic protein targets of thiobenzamide metabolites by 2DGE. Panel A, Coomassie stained 2D gel; panel B, phosphorimage.
